# Supplementary material for: Investigating the Li+substructure and ionic transport in Li10GeP2−xSbxS12(0 ≤x≤ 0.25)
Source: Royal Society of Chemistry journal article supplement (doi:10.1039/d2cp04710a), 2022-12-02
Supplement: d2cp04710a2.pdf [file d2cp04710a2.pdf]

## Supporting Information

—

### Investigating the Li<sup>+</sup> substructure and ionic transport in **Li<sub>10</sub>GeP<sub>2-x</sub>Sb<sub>x</sub>S<sub>12</sub> (0 ≤ x ≤ 0.25)**

Bianca Helm,<sup>a</sup> Lara M. Gronych,<sup>a</sup> Ananya Banik,<sup>a</sup> Martin A. Lange,<sup>a</sup> Cheng Li,<sup>b</sup> and Wolfgang G.  
Zeier<sup>\*a,c</sup>

<sup>a</sup>*Institute of Inorganic and Analytical Chemistry, University of Münster, Corrensstrasse 28/30, D-48149 Münster, Germany.*

<sup>b</sup>*Neutron Scattering Division, Oak Ridge National Laboratory (ORNL), 1 Bethel Valley Road, Oak Ridge, Tennessee 37831-6473, United States.*

<sup>c</sup>*Institut für Energie- und Klimaforschung (IEK), IEK-12: Helmholtz-Institut Münster, Forschungszentrum Jülich, 48149 Münster, Germany.*

\*wzeier@uni-muenster.de

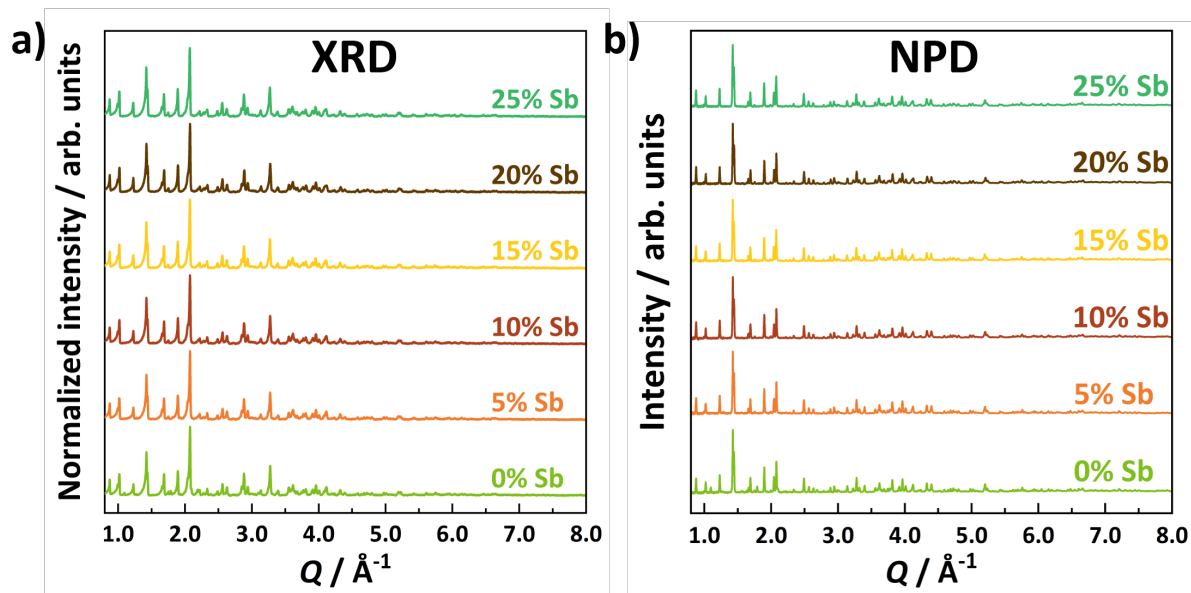

Figure S1: Display of (a) X-ray and (b) neutron diffraction data for the whole substitution series  $\text{Li}_{10}\text{GeP}_{2-x}\text{Sb}_x\text{S}_{12}$  ( $0 \leq x \leq 0.25$ ).

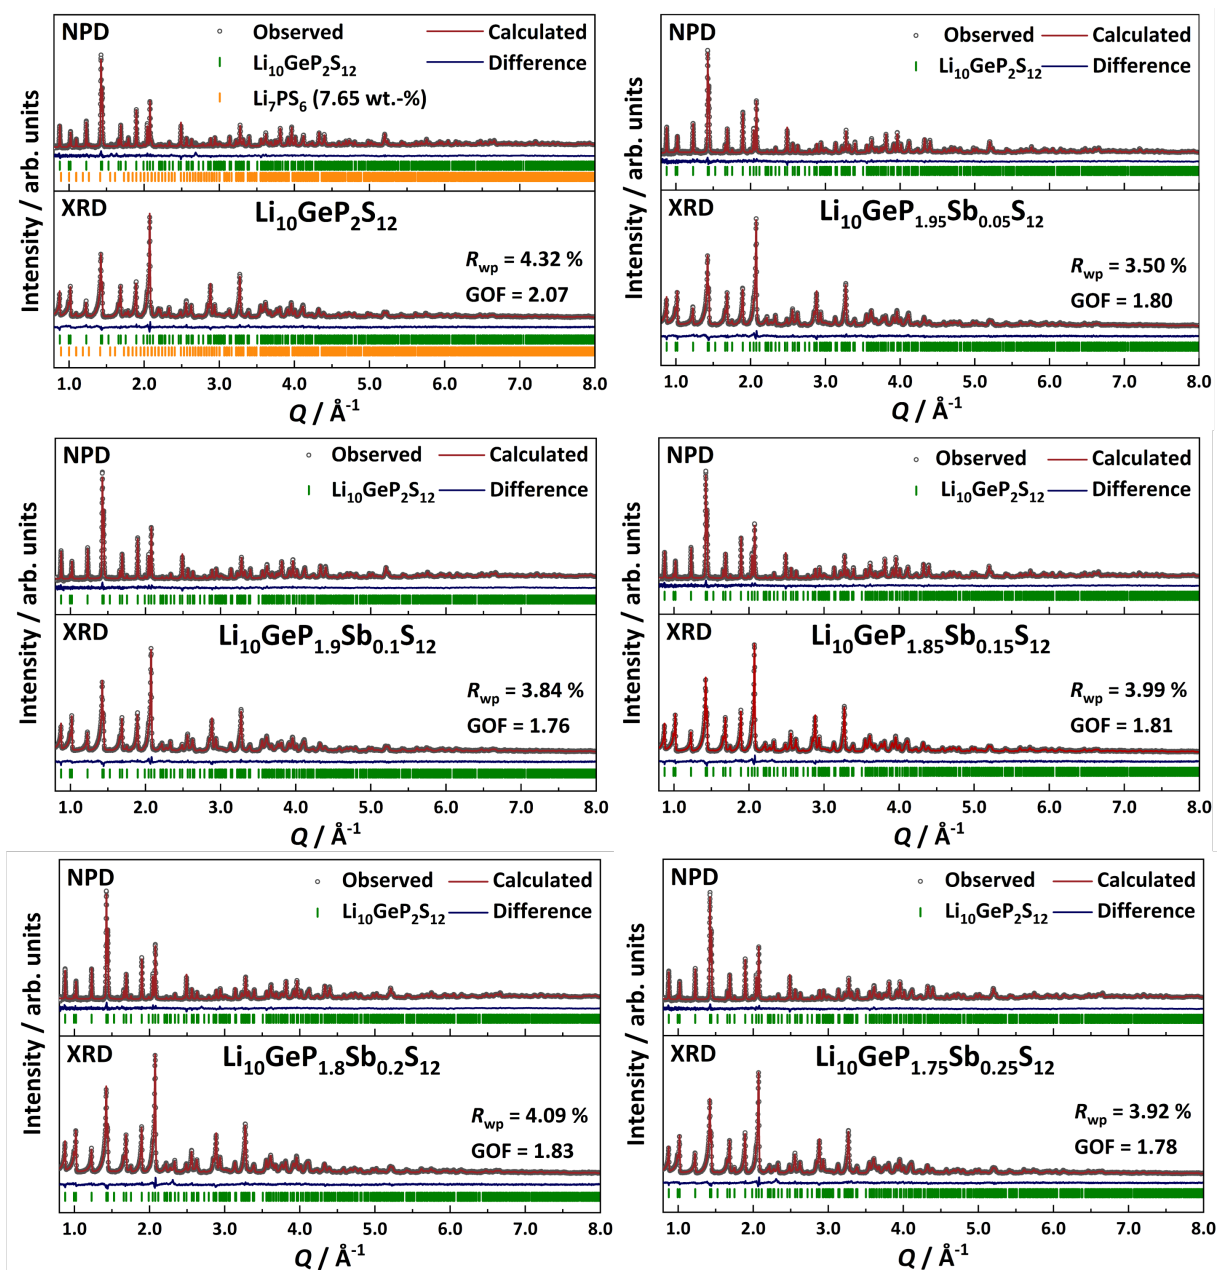

Figure S2: Rietveld refinements against neutron and X-ray diffraction data for the different substitution degrees in  $\text{Li}_{10}\text{GeP}_{2-x}\text{Sb}_x\text{S}_{12}$ .  $R_{\text{wp}}$  and GOF were used as an indicator for the fit quality. The  $d$ -spacings of the main phase ( $\text{Li}_{10}\text{GeP}_2\text{S}_{12}$ ) as well as the side phase ( $\text{Li}_7\text{PS}_6$ ) are displayed in different colors.

Table S1: Constraints used in the Rietveld refinements. Phosphorus, germanium and antimony occupy the same crystallographic site and the atomic coordinates and thermal displacement parameter were therefore constrained to the same value. Additionally, the lithium occupancy was constrained to nominal composition.

| Atom  | Wyckoff position | Atomic coordinates |       |       | Occupancy                                                                      | $B_{iso} / \text{\AA}^2$ |
|-------|------------------|--------------------|-------|-------|--------------------------------------------------------------------------------|--------------------------|
|       |                  | $x$                | $y$   | $z$   |                                                                                |                          |
| Li(1) | 16h              | Pos1               | Pos2  | Pos3  | $(20 - \text{Occ1} \cdot 4 - \text{Occ2} \cdot 16 - \text{Occ3} \cdot 4) / 16$ | Th1                      |
| Li(2) | 4d               | 0.25               | 0.25  | Pos4  | Occ1                                                                           | Th2                      |
| Li(3) | 16h              | Pos5               | Pos6  | Pos7  | Occ2                                                                           | Th3                      |
| Li(4) | 4c               | 0.25               | 0.75  | Pos8  | Occ3                                                                           | Th4                      |
| P(1)  | 4d               | 0.25               | 0.25  | Pos9  | $0.5 - \text{Occ4}$                                                            | Th5                      |
| Sb(1) | 4d               | 0.25               | 0.25  | Pos9  | Occ4                                                                           | Th5                      |
| Ge(1) | 4d               | 0.25               | 0.25  | Pos9  | 0.5                                                                            | Th5                      |
| P(2)  | 2b               | 0.25               | 0.25  | 0.75  | 1                                                                              | Th6                      |
| S(1)  | 8g               | 0.25               | Pos10 | Pos11 | 1                                                                              | Th7                      |
| S(2)  | 8g               | 0.25               | Pos12 | Pos13 | 1                                                                              | Th8                      |
| S(3)  | 8g               | 0.25               | Pos14 | Pos15 | 1                                                                              | Th9                      |

Table S2: Structural data for the nominal composition  $Li_{10}GeP_2S_{12}$  at 300 K.

| <b><math>Li_{10}GeP_2S_{12}</math></b>                                                                                 |                  |                    |           |           |          |                          |
|------------------------------------------------------------------------------------------------------------------------|------------------|--------------------|-----------|-----------|----------|--------------------------|
| <b>Lattice parameter: <math>a = b = 8.7093(1) \text{ \AA}</math>, <math>c = 12.6168(2) \text{ \AA}</math></b>          |                  |                    |           |           |          |                          |
| <b><math>R_{wp} = 4.32 \%</math>, <math>GOF = 2.07</math>, space group = <math>P4_2/nmc</math> (No. 137, origin 2)</b> |                  |                    |           |           |          |                          |
| Atom                                                                                                                   | Wyckoff position | Atomic coordinates |           |           | Occ.     | $B_{iso} / \text{\AA}^2$ |
|                                                                                                                        |                  | $x$                | $y$       | $z$       |          |                          |
| <b>Li(1)</b>                                                                                                           | 16h              | 0.498(1)           | 0.015(1)  | 0.4415(6) | 0.490(8) | 6.0(3)                   |
| <b>Li(2)</b>                                                                                                           | 4d               | 0.25               | 0.25      | 0.1956(6) | 0.94(1)  | 3.1(2)                   |
| <b>Li(3)</b>                                                                                                           | 16h              | 0.515(1)           | -0.018(1) | 0.2854(7) | 0.344(7) | 3.2(3)                   |
| <b>Li(4)</b>                                                                                                           | 4c               | 0.25               | 0.75      | 0.498(1)  | 0.72(1)  | 6.6(5)                   |
| <b>P(1)</b>                                                                                                            | 4d               | 0.25               | 0.25      | 0.9417(3) | 0.5      | 1.26(3)                  |
| <b>Ge(1)</b>                                                                                                           | 4d               | 0.25               | 0.25      | 0.9417(3) | 0.5      | 1.26(3)                  |
| <b>P(2)</b>                                                                                                            | 2b               | 0.25               | 0.25      | 0.75      | 1        | 1.40(5)                  |
| <b>S(1)</b>                                                                                                            | 8g               | 0.25               | 0.9389(2) | 0.6578(2) | 1        | 2.30(5)                  |
| <b>S(2)</b>                                                                                                            | 8g               | 0.25               | 0.0462(2) | 0.3473(2) | 1        | 1.83(5)                  |
| <b>S(3)</b>                                                                                                            | 8g               | 0.25               | 0.4490(2) | 0.0415(2) | 1        | 1.76(5)                  |

Table S3: Structural data for the nominal composition  $Li_{10}GeP_{1.95}Sb_{0.05}S_{12}$  at 300 K.

| <b><math>Li_{10}GeP_{1.95}Sb_{0.05}S_{12}</math></b>                                                                  |                  |                    |           |            |          |                        |
|-----------------------------------------------------------------------------------------------------------------------|------------------|--------------------|-----------|------------|----------|------------------------|
| <b>Lattice parameter: <math>a = b = 8.7114(2)</math> Å, <math>c = 12.6171(3)</math> Å</b>                             |                  |                    |           |            |          |                        |
| <b><math>R_{wp} = 3.50</math> %, <math>GOF = 1.80</math>, space group = <math>P4_2/nmc</math> (No. 137, origin 2)</b> |                  |                    |           |            |          |                        |
| Atom                                                                                                                  | Wyckoff position | Atomic coordinates |           |            | Occ.     | $B_{iso} / \text{Å}^2$ |
|                                                                                                                       |                  | $x$                | $y$       | $z$        |          |                        |
| <b>Li(1)</b>                                                                                                          | 16h              | 0.499(1)           | 0.017(1)  | 0.4387(6)  | 0.477(8) | 5.1(3)                 |
| <b>Li(2)</b>                                                                                                          | 4d               | 0.25               | 0.25      | 0.1955(6)  | 0.93(1)  | 3.4(2)                 |
| <b>Li(3)</b>                                                                                                          | 16h              | 0.514(1)           | -0.020(1) | 0.2870(7)  | 0.358(7) | 4.1(3)                 |
| <b>Li(4)</b>                                                                                                          | 4c               | 0.25               | 0.75      | 0.498(1)   | 0.72(1)  | 7.3(5)                 |
| <b>P(1)</b>                                                                                                           | 4d               | 0.25               | 0.25      | 0.9411(1)  | 0.477(2) | 1.47(3)                |
| <b>Sb(1)</b>                                                                                                          | 4d               | 0.25               | 0.25      | 0.9411(1)  | 0.022(2) | 1.47(3)                |
| <b>Ge(1)</b>                                                                                                          | 4d               | 0.25               | 0.25      | 0.9411(1)  | 0.5      | 1.47(3)                |
| <b>P(2)</b>                                                                                                           | 2b               | 0.25               | 0.25      | 0.75       | 1        | 1.44(5)                |
| <b>S(1)</b>                                                                                                           | 8g               | 0.25               | 0.9386(2) | 0.6581(2)  | 1        | 2.21(5)                |
| <b>S(2)</b>                                                                                                           | 8g               | 0.25               | 0.0462(2) | 0.3478(2)  | 1        | 1.71(5)                |
| <b>S(3)</b>                                                                                                           | 8g               | 0.25               | 0.4488(2) | 0.04093(2) | 1        | 1.58(5)                |

Table S4: Structural data for the nominal composition  $Li_{10}GeP_{1.9}Sb_{0.1}S_{12}$  at 300 K.

| <b><math>Li_{10}GeP_{1.9}Sb_{0.1}S_{12}</math></b>                                                                    |                  |                    |           |           |          |                        |
|-----------------------------------------------------------------------------------------------------------------------|------------------|--------------------|-----------|-----------|----------|------------------------|
| <b>Lattice parameter: <math>a = b = 8.7063(2)</math> Å, <math>c = 12.6233(3)</math> Å</b>                             |                  |                    |           |           |          |                        |
| <b><math>R_{wp} = 3.84</math> %, <math>GOF = 1.76</math>, space group = <math>P4_2/nmc</math> (No. 137, origin 2)</b> |                  |                    |           |           |          |                        |
| Atom                                                                                                                  | Wyckoff position | Atomic coordinates |           |           | Occ.     | $B_{iso} / \text{Å}^2$ |
|                                                                                                                       |                  | $x$                | $y$       | $z$       |          |                        |
| <b>Li(1)</b>                                                                                                          | 16h              | 0.499(1)           | 0.017(1)  | 0.4399(6) | 0.484(8) | 5.8(3)                 |
| <b>Li(2)</b>                                                                                                          | 4d               | 0.25               | 0.25      | 0.1959(6) | 0.92(1)  | 3.5(2)                 |
| <b>Li(3)</b>                                                                                                          | 16h              | 0.514(1)           | -0.021(1) | 0.2866(7) | 0.357(6) | 4.1(3)                 |
| <b>Li(4)</b>                                                                                                          | 4c               | 0.25               | 0.75      | 0.498(1)  | 0.71(1)  | 7.0(5)                 |
| <b>P(1)</b>                                                                                                           | 4d               | 0.25               | 0.25      | 0.9409(1) | 0.453(2) | 1.52(3)                |
| <b>Sb(1)</b>                                                                                                          | 4d               | 0.25               | 0.25      | 0.9409(1) | 0.046(2) | 1.52(3)                |
| <b>Ge(1)</b>                                                                                                          | 4d               | 0.25               | 0.25      | 0.9409(1) | 0.5      | 1.52(3)                |
| <b>P(2)</b>                                                                                                           | 2b               | 0.25               | 0.25      | 0.75      | 1        | 1.51(5)                |
| <b>S(1)</b>                                                                                                           | 8g               | 0.25               | 0.9381(2) | 0.6582(2) | 1        | 2.26(5)                |
| <b>S(2)</b>                                                                                                           | 8g               | 0.25               | 0.0451(2) | 0.3472(2) | 1        | 1.75(5)                |
| <b>S(3)</b>                                                                                                           | 8g               | 0.25               | 0.4493(2) | 0.0411(2) | 1        | 1.62(5)                |

Table S5: Structural data for the nominal composition  $Li_{10}GeP_{1.85}Sb_{0.15}S_{12}$  at 300 K.

| <b><math>Li_{10}GeP_{1.85}Sb_{0.15}S_{12}</math></b>                                                                   |                  |                    |           |            |          |                          |
|------------------------------------------------------------------------------------------------------------------------|------------------|--------------------|-----------|------------|----------|--------------------------|
| <b>Lattice parameter: <math>a = b = 8.7135(2) \text{ \AA}</math>, <math>c = 12.6384(3) \text{ \AA}</math></b>          |                  |                    |           |            |          |                          |
| <b><math>R_{wp} = 3.99 \%</math>, <math>GOF = 1.81</math>, space group = <math>P4_2/nmc</math> (No. 137, origin 2)</b> |                  |                    |           |            |          |                          |
| Atom                                                                                                                   | Wyckoff position | Atomic coordinates |           |            | Occ.     | $B_{iso} / \text{\AA}^2$ |
|                                                                                                                        |                  | $x$                | $y$       | $z$        |          |                          |
| <b>Li(1)</b>                                                                                                           | 16h              | 0.5005(9)          | 0.018(1)  | 0.4390(5)  | 0.470(8) | 5.1(2)                   |
| <b>Li(2)</b>                                                                                                           | 4d               | 0.25               | 0.25      | 0.1958(6)  | 0.94(1)  | 3.6(2)                   |
| <b>Li(3)</b>                                                                                                           | 16h              | 0.515(1)           | -0.022(1) | 0.2874(7)  | 0.366(6) | 4.4(3)                   |
| <b>Li(4)</b>                                                                                                           | 4c               | 0.25               | 0.75      | 0.5002(11) | 0.71(1)  | 7.4(5)                   |
| <b>P(1)</b>                                                                                                            | 4d               | 0.25               | 0.25      | 0.9409(1)  | 0.437(2) | 1.48(3)                  |
| <b>Sb(1)</b>                                                                                                           | 4d               | 0.25               | 0.25      | 0.9409(1)  | 0.062(2) | 1.48(3)                  |
| <b>Ge(1)</b>                                                                                                           | 4d               | 0.25               | 0.25      | 0.9409(1)  | 0.5      | 1.48(3)                  |
| <b>P(2)</b>                                                                                                            | 2b               | 0.25               | 0.25      | 0.75       | 1        | 1.28(5)                  |
| <b>S(1)</b>                                                                                                            | 8g               | 0.25               | 0.9384(2) | 0.6578(2)  | 1        | 2.19 (5)                 |
| <b>S(2)</b>                                                                                                            | 8g               | 0.25               | 0.0448(2) | 0.3469(2)  | 1        | 1.82(5)                  |
| <b>S(3)</b>                                                                                                            | 8g               | 0.25               | 0.4494(2) | 0.0410(2)  | 1        | 1.67(5)                  |



Table S6: Structural data for the nominal composition  $Li_{10}GeP_{1.8}Sb_{0.2}S_{12}$  at 300 K.

| <b><math>Li_{10}GeP_{1.8}Sb_{0.2}S_{12}</math></b>                                                                     |                  |                    |           |           |          |                          |
|------------------------------------------------------------------------------------------------------------------------|------------------|--------------------|-----------|-----------|----------|--------------------------|
| <b>Lattice parameter: <math>a = b = 8.6989(2) \text{ \AA}</math>, <math>c = 12.6361(3) \text{ \AA}</math></b>          |                  |                    |           |           |          |                          |
| <b><math>R_{wp} = 4.09 \%</math>, <math>GOF = 1.83</math>, space group = <math>P4_2/nmc</math> (No. 137, origin 2)</b> |                  |                    |           |           |          |                          |
| Atom                                                                                                                   | Wyckoff position | Atomic coordinates |           |           | Occ.     | $B_{iso} / \text{\AA}^2$ |
|                                                                                                                        |                  | $x$                | $y$       | $z$       |          |                          |
| <b>Li(1)</b>                                                                                                           | 16h              | 0.497(1)           | 0.016(1)  | 0.4406(6) | 0.483(8) | 6.2(3)                   |
| <b>Li(2)</b>                                                                                                           | 4d               | 0.25               | 0.25      | 0.1954(6) | 0.92(1)  | 3.9(2)                   |
| <b>Li(3)</b>                                                                                                           | 16h              | 0.516(1)           | -0.024(1) | 0.2862(7) | 0.360(6) | 4.3(3)                   |
| <b>Li(4)</b>                                                                                                           | 4c               | 0.25               | 0.75      | 0.499(1)  | 0.70(1)  | 6.6(5)                   |
| <b>P(1)</b>                                                                                                            | 4d               | 0.25               | 0.25      | 0.9409(1) | 0.416(2) | 1.55(3)                  |
| <b>Sb(1)</b>                                                                                                           | 4d               | 0.25               | 0.25      | 0.9409(1) | 0.083(2) | 1.55(3)                  |
| <b>Ge(1)</b>                                                                                                           | 4d               | 0.25               | 0.25      | 0.9409(1) | 0.5      | 1.55(3)                  |
| <b>P(2)</b>                                                                                                            | 2b               | 0.25               | 0.25      | 0.75      | 1        | 1.43(5)                  |
| <b>S(1)</b>                                                                                                            | 8g               | 0.25               | 0.9373(2) | 0.6582(2) | 1        | 2.28 (5)                 |
| <b>S(2)</b>                                                                                                            | 8g               | 0.25               | 0.0432(2) | 0.3466(2) | 1        | 1.84(5)                  |
| <b>S(3)</b>                                                                                                            | 8g               | 0.25               | 0.4496(2) | 0.0413(2) | 1        | 1.73(5)                  |

Table S7: Structural data for the nominal composition  $Li_{10}GeP_{1.75}Sb_{0.25}S_{12}$  at 300 K.

| <b><math>Li_{10}GeP_{1.75}Sb_{0.25}S_{12}</math></b>                                                                   |                  |                    |           |           |          |                          |
|------------------------------------------------------------------------------------------------------------------------|------------------|--------------------|-----------|-----------|----------|--------------------------|
| <b>Lattice parameter: <math>a = b = 8.7133(2) \text{ \AA}</math>, <math>c = 12.6515(3) \text{ \AA}</math></b>          |                  |                    |           |           |          |                          |
| <b><math>R_{wp} = 3.92 \%</math>, <math>GOF = 1.78</math>, space group = <math>P4_2/nmc</math> (No. 137, origin 2)</b> |                  |                    |           |           |          |                          |
| Atom                                                                                                                   | Wyckoff position | Atomic coordinates |           |           | Occ.     | $B_{iso} / \text{\AA}^2$ |
|                                                                                                                        |                  | x                  | y         | z         |          |                          |
| Li(1)                                                                                                                  | 16h              | 0.502(1)           | 0.017(1)  | 0.4380(6) | 0.472(8) | 5.2(2)                   |
| Li(2)                                                                                                                  | 4d               | 0.25               | 0.25      | 0.1949(6) | 0.92(1)  | 3.5(2)                   |
| Li(3)                                                                                                                  | 16h              | 0.513(1)           | -0.024(1) | 0.2885(7) | 0.367(6) | 4.6(3)                   |
| Li(4)                                                                                                                  | 4c               | 0.25               | 0.75      | 0.499(1)  | 0.72(1)  | 7.6(5)                   |
| P(1)                                                                                                                   | 4d               | 0.25               | 0.25      | 0.9409(1) | 0.408(2) | 1.43(3)                  |
| Sb(1)                                                                                                                  | 4d               | 0.25               | 0.25      | 0.9409(1) | 0.092(2) | 1.43(3)                  |
| Ge(1)                                                                                                                  | 4d               | 0.25               | 0.25      | 0.9409(1) | 0.5      | 1.43(3)                  |
| P(2)                                                                                                                   | 2b               | 0.25               | 0.25      | 0.75      | 1        | 1.19(5)                  |
| S(1)                                                                                                                   | 8g               | 0.25               | 0.9378(2) | 0.6576(2) | 1        | 2.19 (5)                 |
| S(2)                                                                                                                   | 8g               | 0.25               | 0.0437(2) | 0.3463(2) | 1        | 1.86(5)                  |
| S(3)                                                                                                                   | 8g               | 0.25               | 0.4495(2) | 0.0411(2) | 1        | 1.64(5)                  |

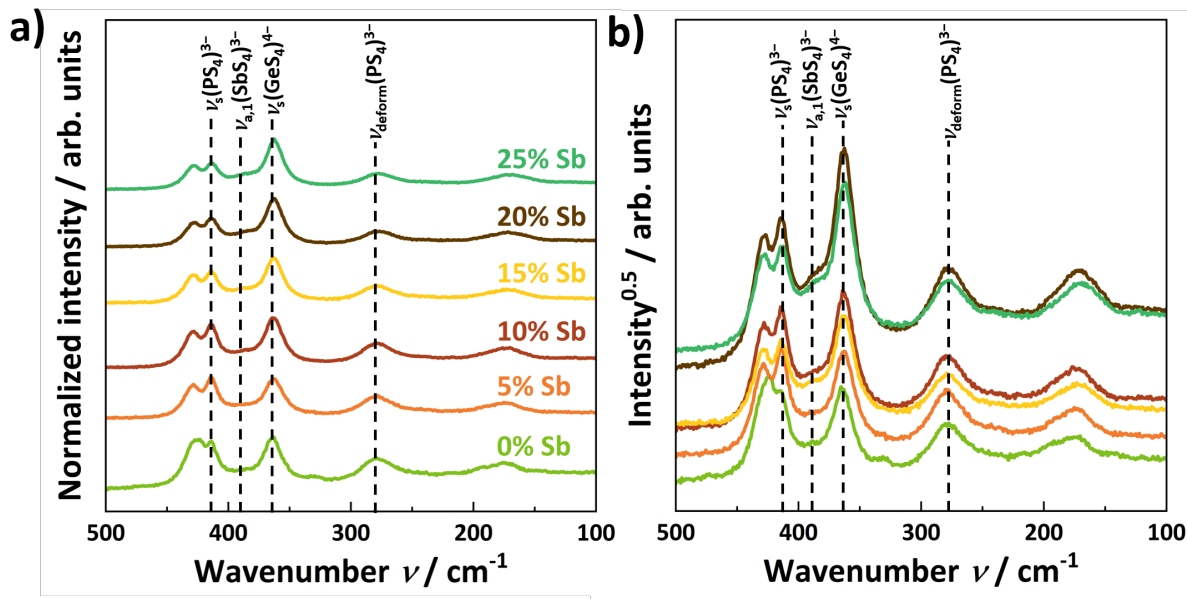

Figure S3: (a) Display of Raman spectra of the different samples showing a similar pattern. (b) Square root plot of the Raman spectra to emphasize the development of a shoulder at  $387\text{ cm}^{-1}$ . The symmetric ( $\nu_s$ ) and deformation ( $\nu_{\text{deform}}$ ) stretch of the  $(\text{PS}_4)^{3-}$  unit, the symmetric stretch of the  $(\text{GeS}_4)^{4-}$  unit and the asymmetric ( $\nu_{a,1}$ ) stretch of the  $(\text{SbS}_4)^{3-}$  unit were observed.<sup>1-3</sup>

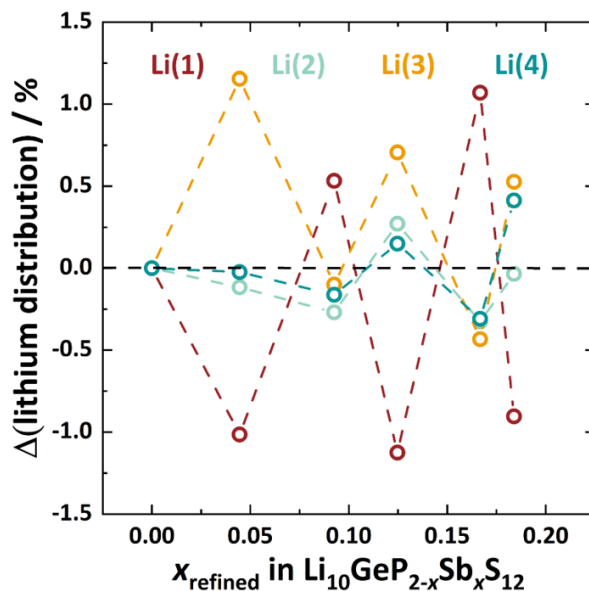

Figure S4: Change in  $\text{Li}^+$  occupancy per substitution step relative to the previous substitution step indicating that around 1% of  $\text{Li}^+$  ions are shifted between the lithium positions.

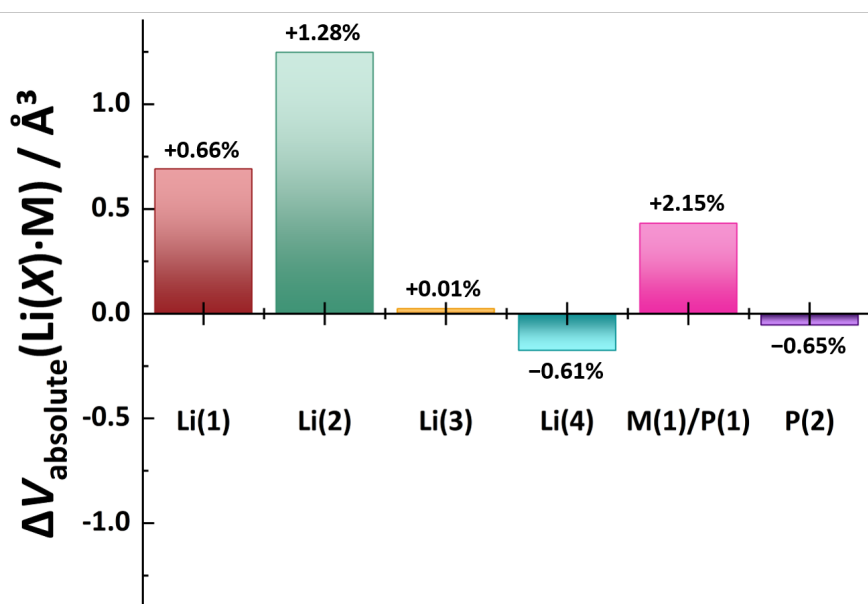

Figure S5: Relative change in polyhedral volume of each respective crystallographic site and the absolute change of polyhedral volume for all Li(X) polyhedra in the unit cell. The relative change was calculated by subtracting the volumes of  $x_{nom}(Sb) = 0$  from 0.25 and dividing by the volume of  $x_{nom}(Sb) = 0.25$ . The absolute change was determined by subtracting the volume of  $x_{nom}(Sb) = 0$  from 0.25, subsequently multiplying with the respective multiplicity  $M$  of each site were used.

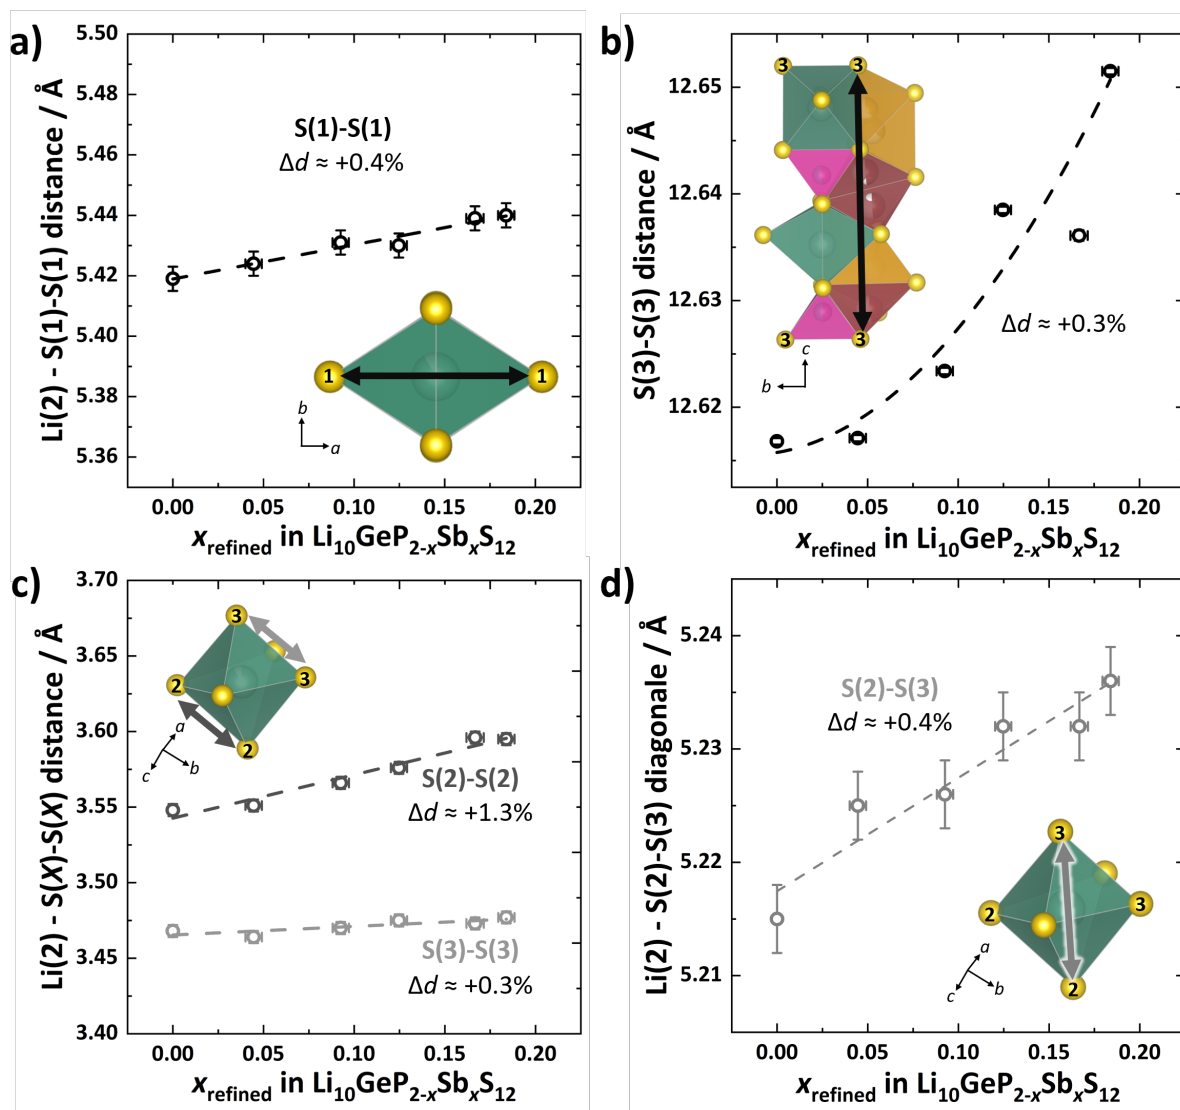

Figure S6: (a) The  $\text{S}(1) - \text{S}(1)$  distance in the  $\text{Li}(2)$  octahedron is increasing showing an expansion into the  $ab$ -plane. (b) The  $\text{S}(3) - \text{S}(3)$  distance increases with higher antimony content. The inset shows that the  $\text{Li}(1) - \text{Li}(3)$  chain and  $\text{Li}(2) - \text{M}(1)/\text{P}(1)$  chain are connected via  $\text{S}(3)$  which suggests a similar expansion in  $c$ -direction. (c) The  $\text{S}(2) - \text{S}(2)$  distances increases, while the  $\text{S}(3) - \text{S}(3)$  distance remains similar. Both  $\text{S}(X) - \text{S}(X)$  arrangements are located in the  $ab$ -plane. (d) The diagonal of  $\text{S}(2) - \text{S}(3)$  square is increasing which is indicative for an increase in  $c$ -direction. The dashed lines are added as guides-to-the-eyes and all structural changes are giving in percentage to gauge the minor overall changes.

*Table S9: Height and relative density of the pellets used for temperature-dependent impedance measurements in pouch cells.*

| $x_{\text{nom}}$ in $\text{Li}_{10}\text{GeP}_{2-x}\text{Sb}_x\text{S}_4$ | pellet height / cm | relative pellet density / % |
|---------------------------------------------------------------------------|--------------------|-----------------------------|
| <b>0</b>                                                                  | 0.196              | 74                          |
| <b>0.05</b>                                                               | 0.194              | 80                          |
| <b>0.10</b>                                                               | 0.192              | 75                          |
| <b>0.15</b>                                                               | 0.192              | 75                          |
| <b>0.20</b>                                                               | 0.178              | 74                          |
| <b>0.25</b>                                                               | 0.184              | 74                          |

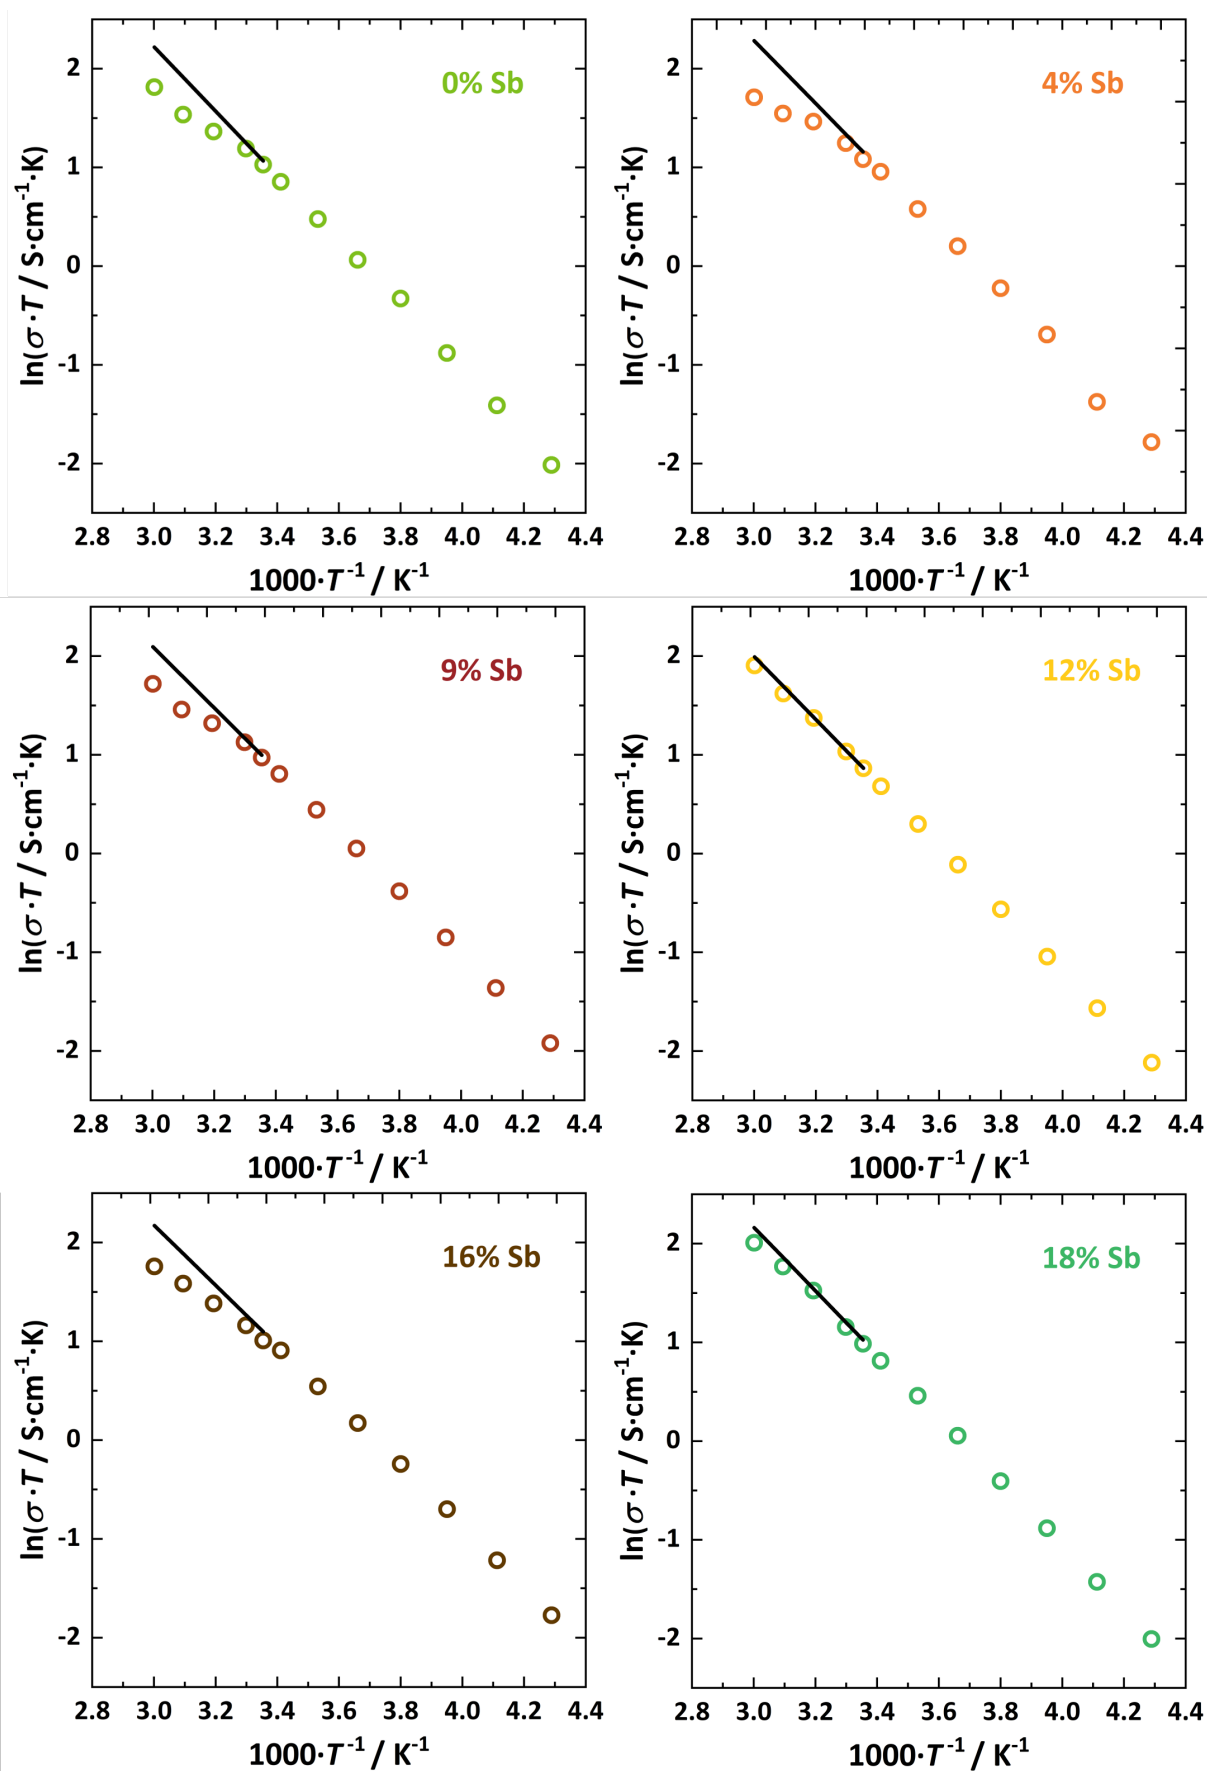

Figure S7: Display of the Arrhenius plots of the substitution series from  $-40^{\circ}\text{C}$  up to  $60^{\circ}\text{C}$  showing that at higher temperatures the determined conductivity is underestimated to a certain

extent due to the occurring inductance. The underestimation is lesser or stronger depending on the sample ( $\circ$  = measured data; straight line = extrapolated data).

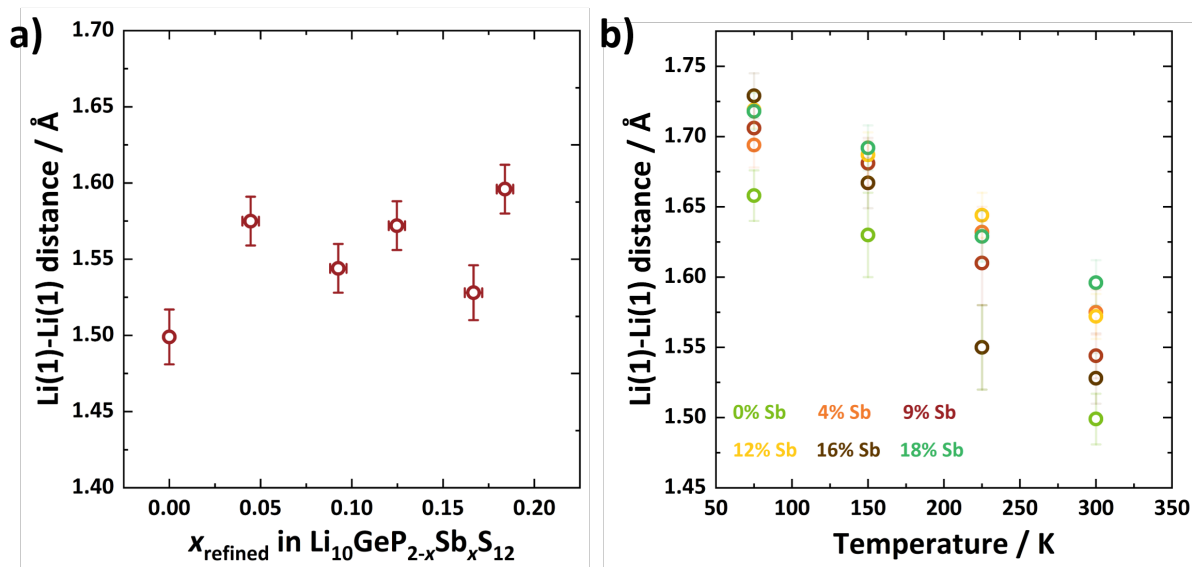

Figure S8: (a) The change in Li(1)-Li(1) distance dependent on the Sb content in LGPS. (b) Temperature-dependent behavior of the Li(1)-Li(1) distance.

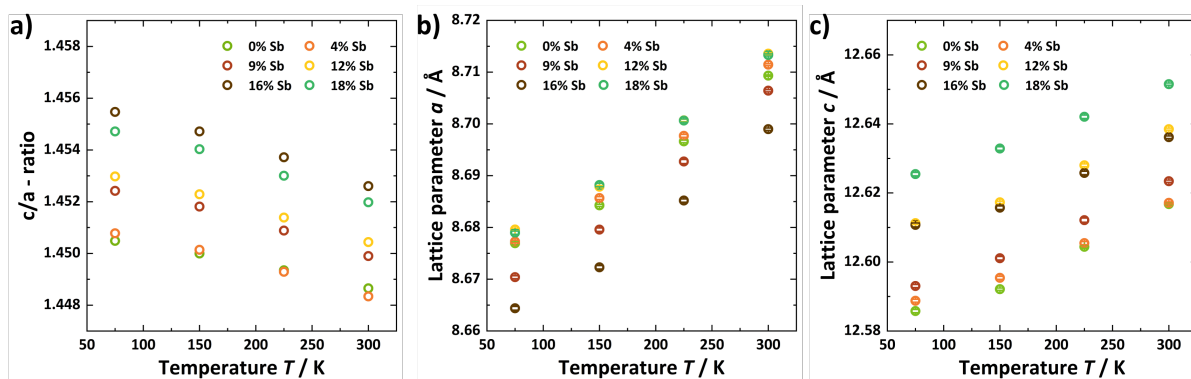

Figure S9: Illustration of temperature dependence on (a) the  $c/a$ -ratio, (b) lattice parameter  $a$  and (c) lattice parameter of  $\text{Li}_{10}\text{GeP}_{2-x}\text{Sb}_x\text{S}_{12}$ .

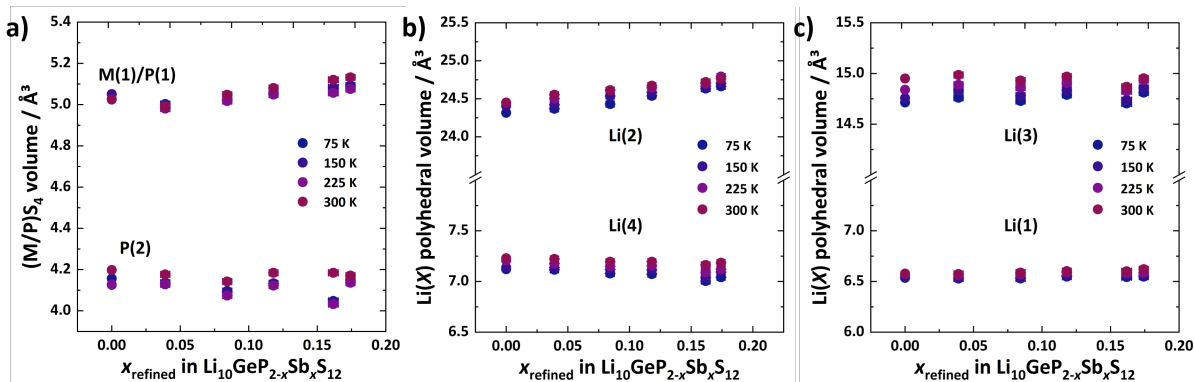



Figure S10: The volume changes of (a) M(1)/P(1) and P(2), (b) Li(2) and Li(4) as well as (c) Li(1) and Li(3) are shown.

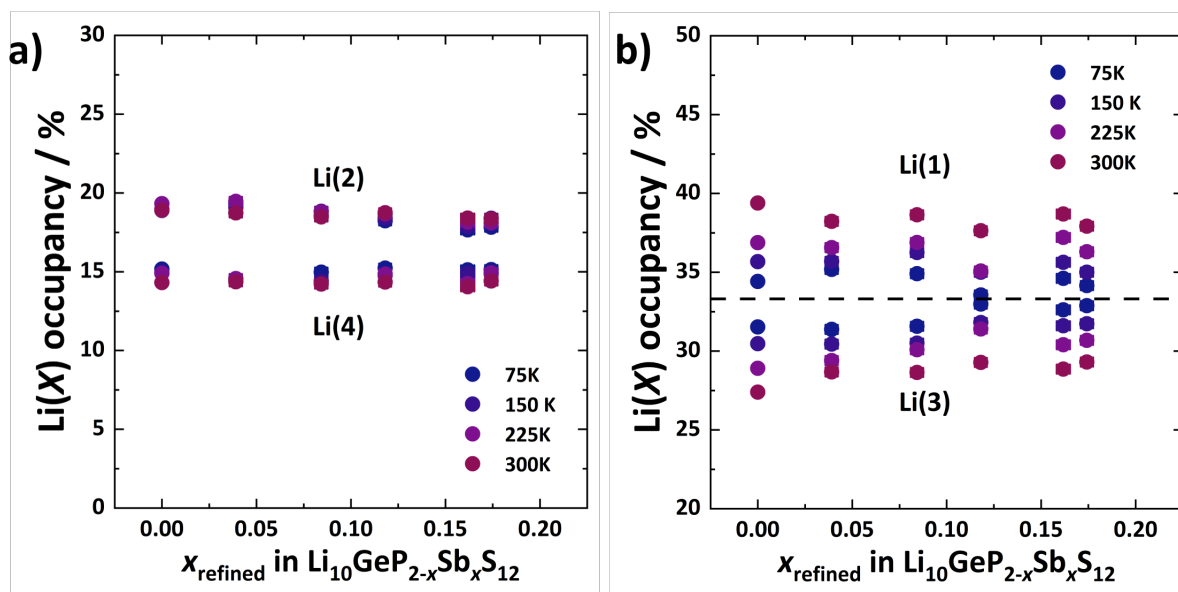

Figure S11: Lithium distribution dependent on the temperature showing that (a) Li(2) and Li(4) occupancy is similar for all temperatures, while (b) for Li(1) and Li(3) the  $\text{Li}^+$  ions redistribute with temperature. Lower temperatures have comparable occupancies for Li(1) and Li(3), while at higher temperatures Li(1) is preferably occupied. The dashed line in (b) is for clarifying the different data sets.

## References

- 1 W. Mikenda and A. Preisinger, *Spectrochim. Acta Part A Mol. Spectrosc.*, 1980, **36**, 365–370.
- 2 T. Fuchs, S. P. Culver, P. Till and W. G. Zeier, *ACS Energy Lett.*, 2020, **5**, 146–151.
- 3 S. P. Culver, A. G. Squires, N. Minafra, C. W. F. Armstrong, T. Krauskopf, F. Böcher, C. Li, B. J. Morgan and W. G. Zeier, *J. Am. Chem. Soc.*, 2020, **142**, 21210–21219.
